# Supplementary material for: A comprehensive bioinformatics analysis on multiple Gene Expression Omnibus datasets of nonalcoholic fatty liver disease and nonalcoholic steatohepatitis
Source: PubMed Central journal article supplement (PMC5955936; doi:10.1038/s41598-018-25658-4), 2018-05-16
Supplement: 41598_2018_25658_MOESM1_ESM.pdf [file 41598_2018_25658_MOESM1_ESM.pdf]

**A comprehensive bioinformatics analysis on multiple Gene Expression Omnibus datasets of nonalcoholic fatty liver disease and nonalcoholic steatohepatitis**

Shanzhou Huang<sup>1,2,3,†</sup>, Chengjun Sun<sup>1,2,3,†</sup>, Yuchen Hou<sup>1,2,3,†</sup>, Yunhua Tang<sup>1,2,3</sup>, Zebin Zhu<sup>1,2,3</sup>, Zhiheng Zhang<sup>1,2,3</sup>, Yixi Zhang<sup>1,2,3</sup>, Linhe Wang<sup>1,2,3</sup>, Qiang Zhao<sup>1,2,3</sup>, Mao-Gen Chen<sup>1,2,3</sup>, Zhiyong Guo<sup>1,2,3</sup>, Dongping Wang<sup>1,2,3</sup>, Weiqiang Ju<sup>1,2,3</sup>, Qi Zhou<sup>4,\*</sup>, Linwei Wu<sup>1,2,3,\*</sup>, Xiaoshun He<sup>1,2,3,\*</sup>

<sup>1</sup>Organ Transplant Center, The First Affiliated Hospital, Sun Yat-sen University, Guangzhou 510080, China

<sup>2</sup>Guangdong Provincial Key Laboratory of Organ Donation and Transplant Immunology, Guangzhou 510080, China

<sup>3</sup>Guangdong Provincial International Cooperation Base of Science and Technology (Organ Transplantation), Guangzhou 510080, China

<sup>4</sup> Department of General Surgery, Hui Ya Hospital of The First Affiliated Hospital, Sun Yat-sen University, Huizhou, Guangdong 516081, China.

**\*Corresponding authors:** Xiaoshun He, M.D., Linwei Wu, M.D., Qi Zhou, M.D., Organ Transplant Center, The First Affiliated Hospital, Sun Yat-sen University, NO. 58 Zhongshan Er Road, Guangzhou 510080, China (E-mail: gdtrc@163.com, lw97002@163.com and hnzhouqi@163.com)

†These authors contributed equally to the article and should be considered co-first authors.

Table S1: Sequence of primers used for validation of expression levels of co-expressed DEGs.

| Genes    | Sequence                 |
|----------|--------------------------|
| CD24-S   | TGCTCCTACCCACGCAGATT     |
| CD24-A   | TTGGTGGTGGCATTAGTTGGAT   |
| COL1A1-S | GACATCCCACCAATCACCTGC    |
| COL1A1-A | TCGACGCCGGTGGTTTCTT      |
| COL1A2-S | TGCCTAGCAACATGCCAATCTT   |
| COL1A2-A | TGAGCAGCAAAGTTCCCACC     |
| EPHA3-S  | AACTGATTCCGCAGCCTTCC     |
| EPHA3-A  | GGACCCAGTTTGTTCAGCC      |
| LUM-S    | CTGGCTGATAGTGGAAATACCTGG |
| LUM-A    | GGTTTCTGAGATGCGATTGCC    |
| THBS2-S  | TCTGGACGAGCCCTTCTACGA    |
| THBS2-A  | GATGGCGTTGATCTCAGCTCC    |
| TUBB-S   | CTGACCACACCAACCTACGG     |
| TUBB-A   | CCAGGCATAAAGAAATGGAGAC   |
| VCAN-S   | TCAGAAGGCTTGTTTGGACGTT   |
| VCAN-A   | CAGCCTCCTCGAAGGTGAATT    |
| PZP-A    | TGGCAGTTTGGTTGGTCGTAG    |
| PZP-S    | CAGCAAAGACAGTCAGCACCAC   |

-S, sense; -A, anti-sense.
